# Supplementary material for: Molecular Biomarkers of Sessile Serrated Adenoma/Polyps
Source: PubMed Central journal article supplement (PMC6970553; doi:10.14309/ctg.0000000000000104), 2019-11-26
Supplement: ct9-10-e00104-s001.pdf [file ct9-10-e00104-s001.pdf]

## Supplemental Table 1

| <u>Gene</u> | <b>Fold Change</b> |                      |                   |
|-------------|--------------------|----------------------|-------------------|
|             | <u>vs HPs</u>      | <u>vs Uninvolved</u> | <u>vs Control</u> |
| CRYBA2      | -4.85              | -3.73                | -4.33             |
| FSCN1       | 3.16               | 3.73                 | 3.25              |
| MUC6        | 17.28              | 240.78               | 3485.29           |
| SEMG1       | 4.93               | 29.89                | 22.99             |
| TRNP1       | 2.27               | 11.32                | 12.39             |
| ZIC2        | 6.72               | 42.97                | 44.76             |
| ZIC5        | 8.3                | 32.44                | 91.3              |

All 21 comparisons were statistically significant by Mann Whitney U-Test ( $p < 0.0001$ )

| <b>Gene</b> | <b>Description</b>               | <b>Function/Process</b>                         |
|-------------|----------------------------------|-------------------------------------------------|
| CRYBA2      | crystallin beta A2               | protein binding, lens development               |
| FSCN1       | fascin actin-binding protein 1   | actin filament binding, cell migration          |
| MUC6        | mucin 6                          | extracellular matrix, maintenance of epithelium |
| SEMG1       | semenogelin 1                    | protein binding, antibacterial humoral response |
| TRNP1       | TMF1 regulated nuclear protein 1 | DNA binding, cell cycle                         |
| ZIC2        | Zic family member 2              | DNA binding, cell differentiation               |
| ZIC5        | Zic family member 5              | DNA binding, cell differentiation               |

| <b>Gene</b> | <b>Relevance to colon polyps / cancer</b>     |
|-------------|-----------------------------------------------|
| CRYBA2      | unknown                                       |
| FSCN1       | tumor invasion                                |
| MUC6        | epithelium integrity / organogenesis          |
| SEMG1       | unknown                                       |
| TRNP1       | highly expressed in right-sided colon cancers |
| ZIC2        | regulates WNT signaling                       |
| ZIC5        | regulates WNT signaling                       |
