# Supplementary material for: Molecular Biomarkers of Sessile Serrated Adenoma/Polyps
Source: PubMed Central journal article supplement (PMC6970553; doi:10.14309/ctg.0000000000000104), 2019-11-26

## Supplemental Figure 1

### FFPE Sample Flow Diagram

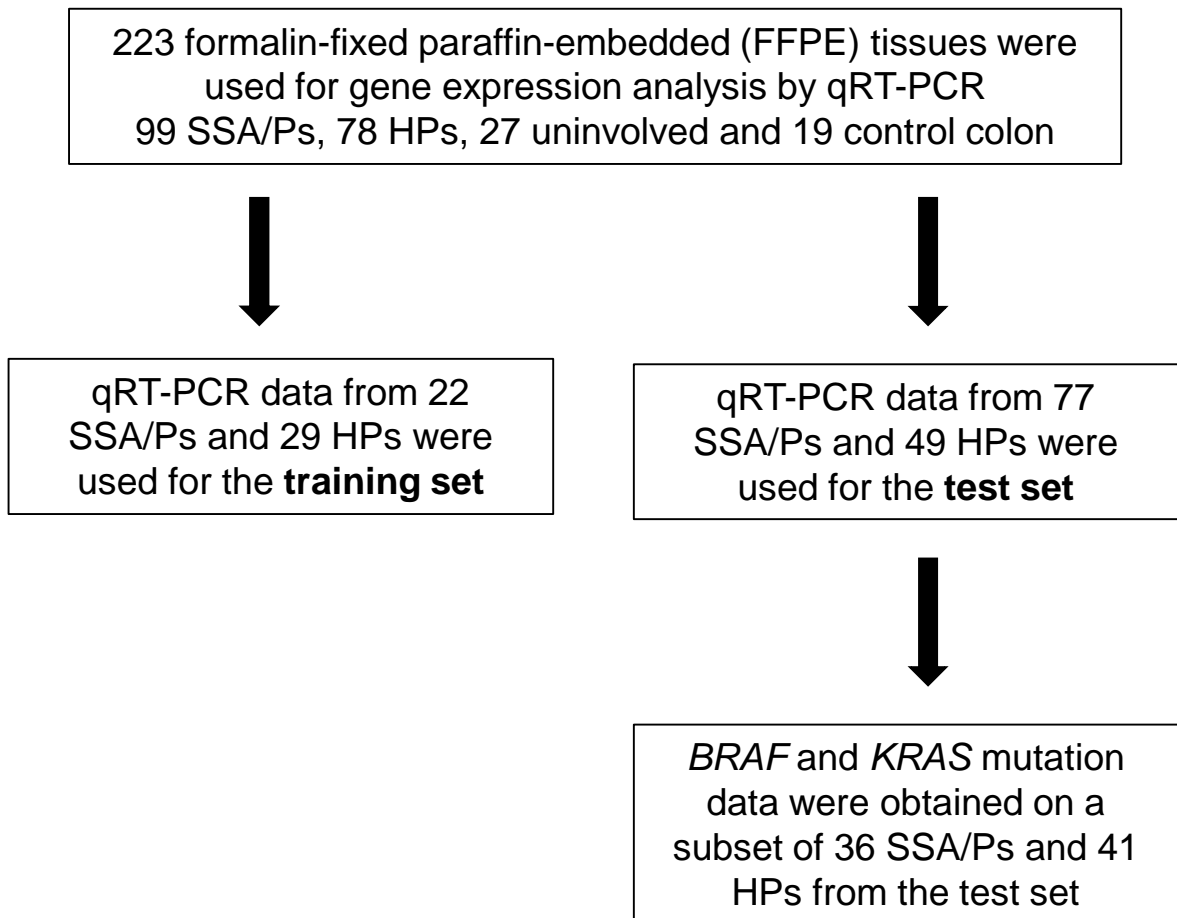

Supplement: ct9-10-e00104-s002.pdf [file ct9-10-e00104-s002.pdf]
