# Supplementary material for: Molecular Biomarkers of Sessile Serrated Adenoma/Polyps
Source: PubMed Central journal article supplement (PMC6970553; doi:10.14309/ctg.0000000000000104), 2019-11-26

Supplemental Figure 2

FSCN1

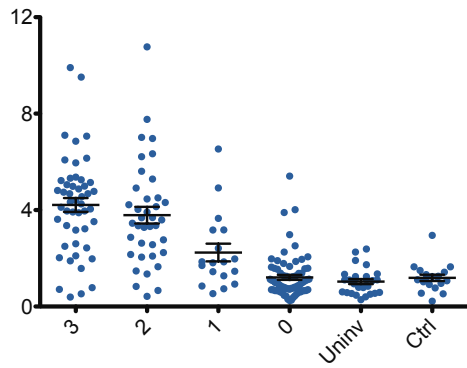

MUC6

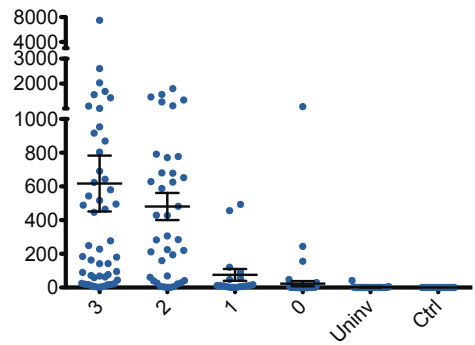

SEMG1

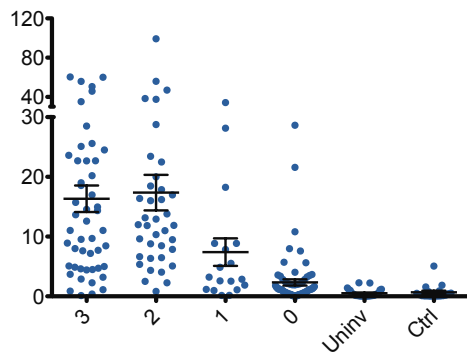

TRNP1

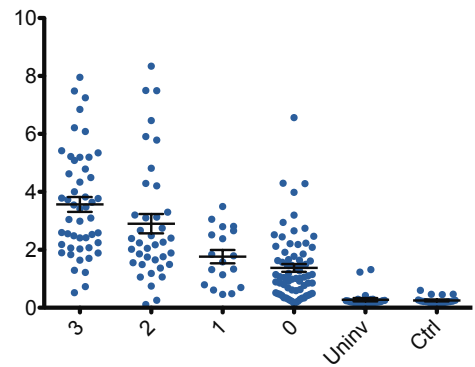

ZIC2

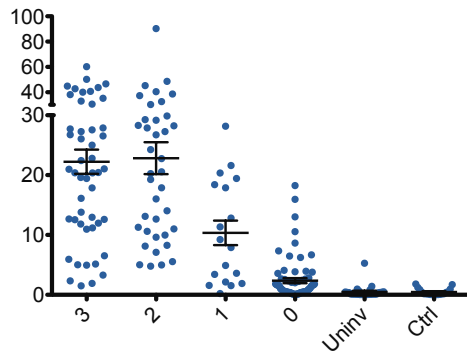

ZIC5

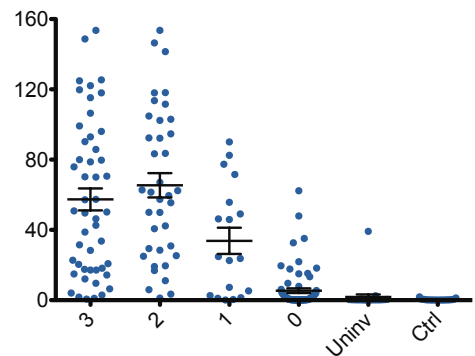

CRYBA2

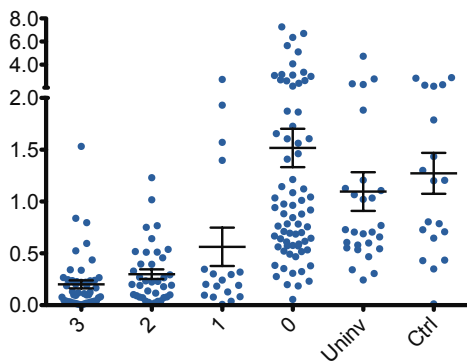

Supplement: ct9-10-e00104-s003.pdf [file ct9-10-e00104-s003.pdf]
