# Supplementary material for: Molecular Biomarkers of Sessile Serrated Adenoma/Polyps
Source: PubMed Central journal article supplement (PMC6970553; doi:10.14309/ctg.0000000000000104), 2019-11-26
Supplement: ct9-10-e00104-s004.pdf [file ct9-10-e00104-s004.pdf]

**Supplemental Table 3**

Mann-Whitney p values for 4 comparisons to 'polyp 0' category -across all 223 samples

|               | <b>0 vs 3</b> | <b>0 vs 2</b> | <b>0 vs 1</b> | <b>0 vs Ctrl</b> |
|---------------|---------------|---------------|---------------|------------------|
| <b>FSCN1</b>  | <0.0001       | <0.0001       | 0.0009        | 0.4038           |
| <b>MUC6</b>   | <0.0001       | <0.0001       | <0.0001       | <0.0001          |
| <b>SEMG1</b>  | <0.0001       | <0.0001       | 0.0026        | 0.0003           |
| <b>TRNP1</b>  | <0.0001       | <0.0001       | 0.0586        | <0.0001          |
| <b>ZIC2</b>   | <0.0001       | <0.0001       | <0.0001       | 0.0002           |
| <b>ZIC5</b>   | <0.0001       | <0.0001       | <0.0001       | 0.0003           |
| <b>CRYBA2</b> | <0.0001       | <0.0001       | <0.0001       | 0.8261           |

**n for each of these tissue categories:**

|      |    |
|------|----|
| 3    | 49 |
| 2    | 38 |
| 1    | 18 |
| 0    | 72 |
| Ctrl | 19 |
