# Supplementary material for: Molecular Biomarkers of Sessile Serrated Adenoma/Polyps
Source: PubMed Central journal article supplement (PMC6970553; doi:10.14309/ctg.0000000000000104), 2019-11-26

# Supplemental Figure 3

## CRYBA2

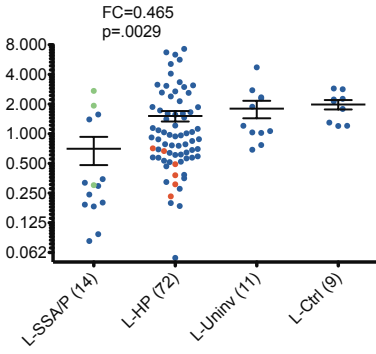

## FSCN1

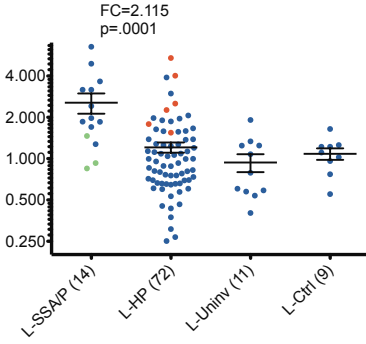

## MUC6

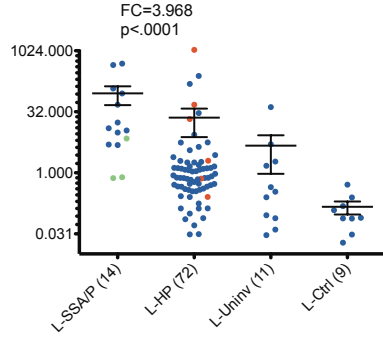

## SEMG1

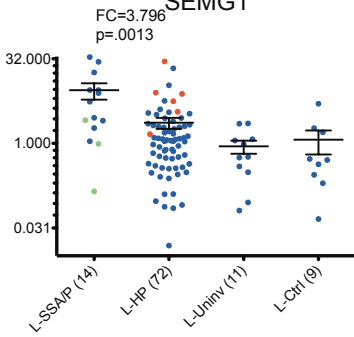

## TRNP1

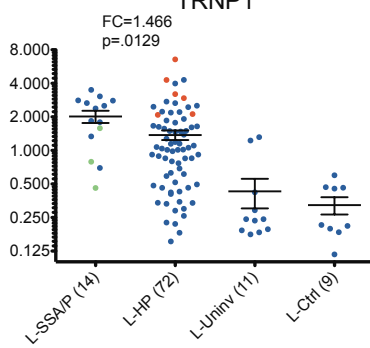

## ZIC2

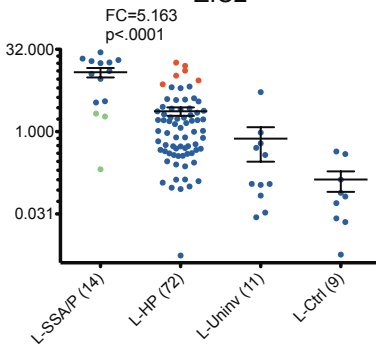

## ZIC5

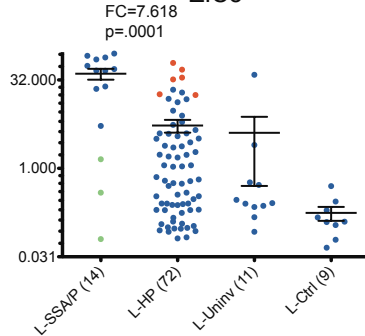

Supplement: ct9-10-e00104-s005.pdf [file ct9-10-e00104-s005.pdf]
