# Supplementary material for: Molecular Biomarkers of Sessile Serrated Adenoma/Polyps
Source: PubMed Central journal article supplement (PMC6970553; doi:10.14309/ctg.0000000000000104), 2019-11-26
Supplement: ct9-10-e00104-s006.pdf [file ct9-10-e00104-s006.pdf]

| <b>FSCN1</b>       |       | p value |
|--------------------|-------|---------|
| 3&2_BRAFmut(n=29): | 3.933 | 0.1288  |
| 3&2_BRAFwt(n=7):   | 2.492 |         |
| 1_BRAFmut(n=8):    | 2.768 | 0.0121  |
| 1_BRAFwt(n=3):     | 1.103 |         |
| 0_BRAFmut(n=19):   | 1.453 | 0.6323  |
| 0_KRASmut(n=8):    | 0.869 | 0.9212  |
| 0_BRAFwt(n=3):     | 1.024 |         |

| <b>MUC6</b>        |         | p value |
|--------------------|---------|---------|
| 3&2_BRAFmut(n=29): | 206.479 | 0.2805  |
| 3&2_BRAFwt(n=7):   | 285.015 |         |
| 1_BRAFmut(n=8):    | 79.873  | 0.0485  |
| 1_BRAFwt(n=3):     | 2.272   |         |
| 0_BRAFmut(n=19):   | 38.339  | 0.0445  |
| 0_KRASmut(n=8):    | 1.140   | 0.1939  |
| 0_BRAFwt(n=3):     | 0.231   |         |

| <b>SEMG1</b>       |        | p value |
|--------------------|--------|---------|
| 3&2_BRAFmut(n=29): | 13.646 | 0.2631  |
| 3&2_BRAFwt(n=7):   | 8.036  |         |
| 1_BRAFmut(n=8):    | 10.707 | 0.0242  |
| 1_BRAFwt(n=3):     | 1.513  |         |
| 0_BRAFmut(n=19):   | 2.770  | 0.9323  |
| 0_KRASmut(n=8):    | 1.912  | 1.000   |
| 0_BRAFwt(n=3):     | 1.951  |         |

| <b>TRNP1</b>       |       | p value |
|--------------------|-------|---------|
| 3&2_BRAFmut(n=29): | 3.069 | 0.7796  |
| 3&2_BRAFwt(n=7):   | 3.489 |         |
| 1_BRAFmut(n=8):    | 2.421 | 0.0121  |
| 1_BRAFwt(n=3):     | 0.636 |         |
| 0_BRAFmut(n=19):   | 2.117 | 0.0353  |
| 0_KRASmut(n=8):    | 0.485 | 0.6303  |
| 0_BRAFwt(n=3):     | 0.655 |         |

| <b>ZIC2</b>        |        | p value |
|--------------------|--------|---------|
| 3&2_BRAFmut(n=29): | 17.023 | 0.0415  |
| 3&2_BRAFwt(n=7):   | 9.052  |         |
| 1_BRAFmut(n=8):    | 11.854 | 0.0121  |
| 1_BRAFwt(n=3):     | 1.298  |         |
| 0_BRAFmut(n=19):   | 2.891  | 0.0098  |
| 0_KRASmut(n=8):    | 0.596  | 0.0848  |
| 0_BRAFwt(n=3):     | 0.140  |         |

| <b>ZIC5</b>        |        | p value |
|--------------------|--------|---------|
| 3&2_BRAFmut(n=29): | 44.847 | 0.1872  |
| 3&2_BRAFwt(n=7):   | 30.202 |         |
| 1_BRAFmut(n=8):    | 35.014 | 0.0242  |
| 1_BRAFwt(n=3):     | 4.941  |         |
| 0_BRAFmut(n=19):   | 6.696  | 0.0074  |
| 0_KRASmut(n=8):    | 0.650  | 0.6303  |
| 0_BRAFwt(n=3):     | 0.080  |         |

| <b>CRYBA2</b>      |       | p value |
|--------------------|-------|---------|
| 3&2_BRAFmut(n=29): | 0.166 | 0.1391  |
| 3&2_BRAFwt(n=7):   | 0.109 |         |
| 1_BRAFmut(n=8):    | 0.382 | 0.0485  |
| 1_BRAFwt(n=3):     | 1.763 |         |
| 0_BRAFmut(n=19):   | 1.056 | 0.0074  |
| 0_KRASmut(n=8):    | 1.278 | 0.0121  |
| 0_BRAFwt(n=3):     | 2.759 |         |
